# Supplementary material for: Biomimetic oxidation of cyclic and linear alkanes: high alcohol selectivity promoted by a novel manganese porphyrin catalyst
Source: Royal Society of Chemistry journal article supplement (doi:10.1039/c6nj03072f), 2016-12-12
Supplement: c6nj03072f1.pdf [file c6nj03072f1.pdf]

## Electronic Supporting Information

### **Biomimetic oxidation of cyclic and linear alkanes: high alcohol selectivity promoted by a novel manganese porphyrin catalyst**

Vinicius Santos da Silva,<sup>a</sup> Warleson Cândido dos Santos Vieira,<sup>a</sup> Alexandre Moreira Meireles,<sup>a</sup> Geani Maria Ucoski,<sup>b</sup> Shirley Nakagaki,<sup>b</sup> Ynara Marina Idemori,<sup>a</sup> Gilson DeFreitas-Silva<sup>a</sup>

\*gilsonufmg@ufmg.br

<sup>a</sup>Departamento de Química, Instituto de Ciências Exatas, Universidade Federal de Minas Gerais (UFMG), 31.270-901. Belo Horizonte, MG, Brazil.

<sup>b</sup>Laboratório de Bioinorgânica e Catálise, Departamento de Química –Centro Politécnico, Universidade Federal do Paraná (UFPR), 81.531-980. Curitiba, PR, Brazil.

#### **\*Corresponding author:**

Prof. Gilson de Freitas Silva (G. DeFreitas-Silva)

Departamento de Química – Instituto de Ciências Exatas – Universidade Federal de Minas Gerais

Belo Horizonte, MG, 31270-901, BRAZIL

Tel.: +55 31 3409 5772.

Email address: gilsonufmg@ufmg.br

The brominated free-base porphyrin  $H_2[Br_{12}T4(-OMe)PP]$ , Figure S1, was obtained according to the methodology described by Rebouças et al 2002 [1]. Then, the porphyrin was characterized by UV-Vis spectroscopy (Figure S2) and  $^1H$  NMR (Figure S4).

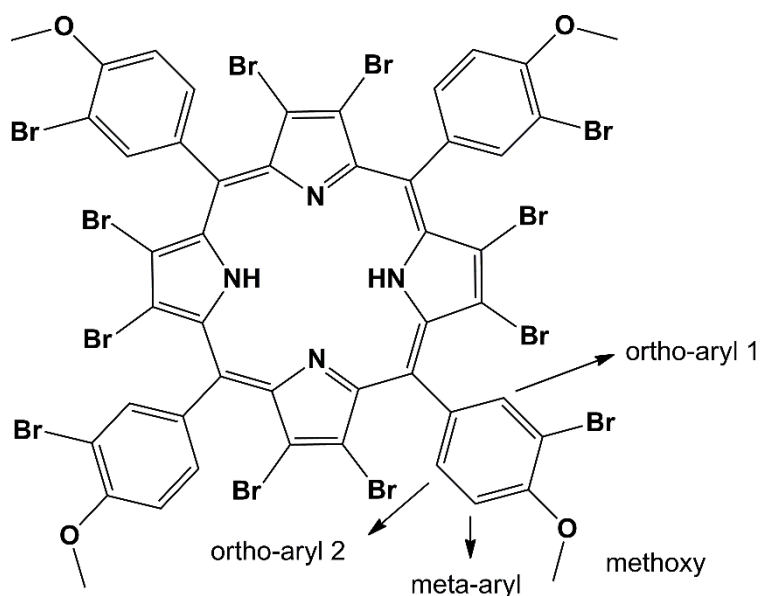

**Figure S1.** Structural representation of the brominated free-base porphyrin  $H_2Br_{12}T4(-OMe)PP$  ( $H_2Br_{12}Por$ ).

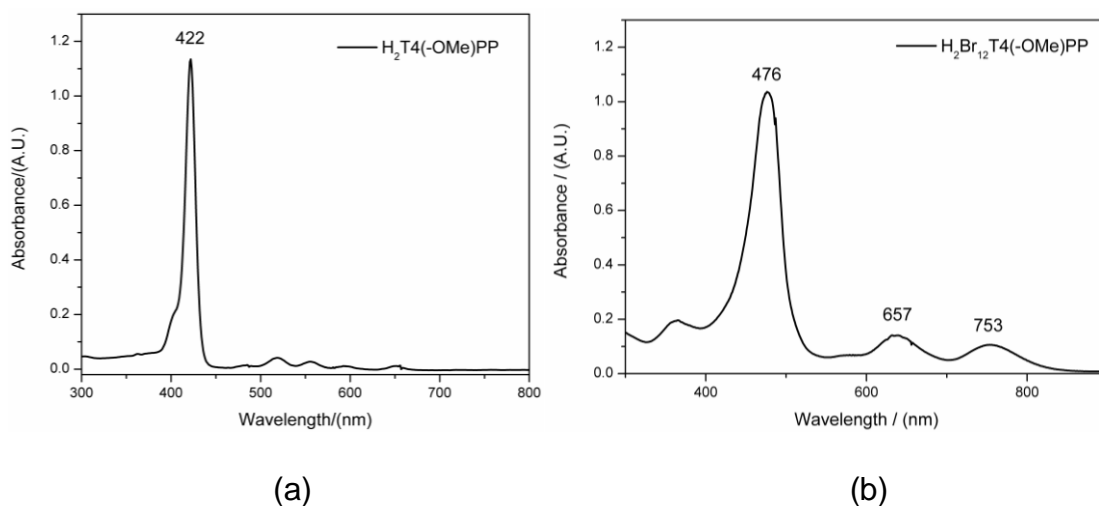

**Figure S2.** UV-vis spectrum of the (a) free-base porphyrin  $H_2T4(-OMe)PP$  ( $H_2Por$ ,  $3.15 \times 10^{-6} \text{ mol L}^{-1}$ ) and (b) brominated free-base porphyrin  $H_2Br_{12}T4(-OMe)PP$  ( $H_2Br_{12}Por$ ) in  $CH_2Cl_2$ .

The spectrum of the H<sub>2</sub>Br<sub>12</sub>T4(-OMe)PP Figure S2 (b) reveals a bathochromic shift of the Soret band as compared to the spectrum of the free-base porphyrin H<sub>2</sub>T4(-OMe)PP Figure S2 (a). This usually occurs upon bromination of free-base porphyrins and has been reported in the literature [2, 3].

Analysis of the <sup>1</sup>H NMR spectra indicated that bromine atoms were introduced into one of the *ortho* positions relative to the methoxy (-OCH<sub>3</sub>) substituents and into each of the β-pyrrole positions of the macrocycle.

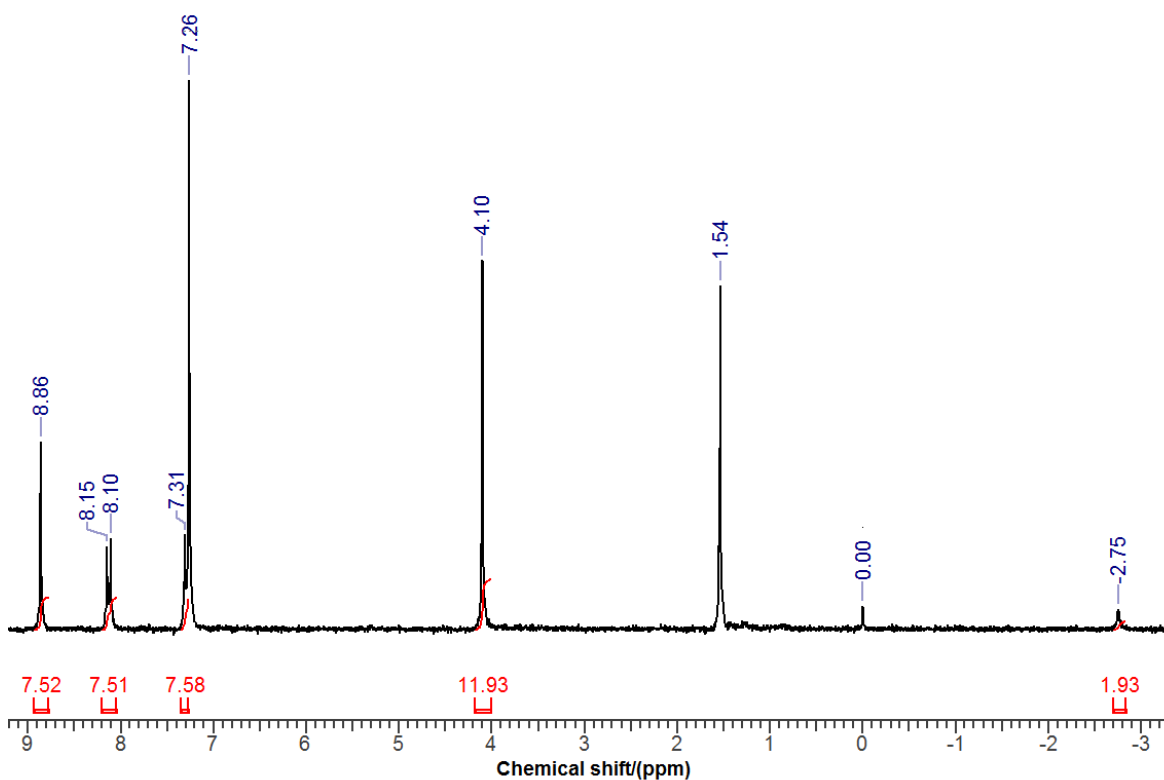

**Figure S3.** <sup>1</sup>H NMR spectrum of H<sub>2</sub>T4(-OMe)PP (H<sub>2</sub>Por) recorded at 400 MHz, in CDCl<sub>3</sub> at 25 °C. δ 8.86 (s, 8H, β-pyrrole) 8.15 (d, 4H, *ortho*-aryl), 8.07 (m, 8H, *meta*-aryl), 4.10 (s, 12H, methoxy) and -2.75 (s, 2H, pyrrole N-H).

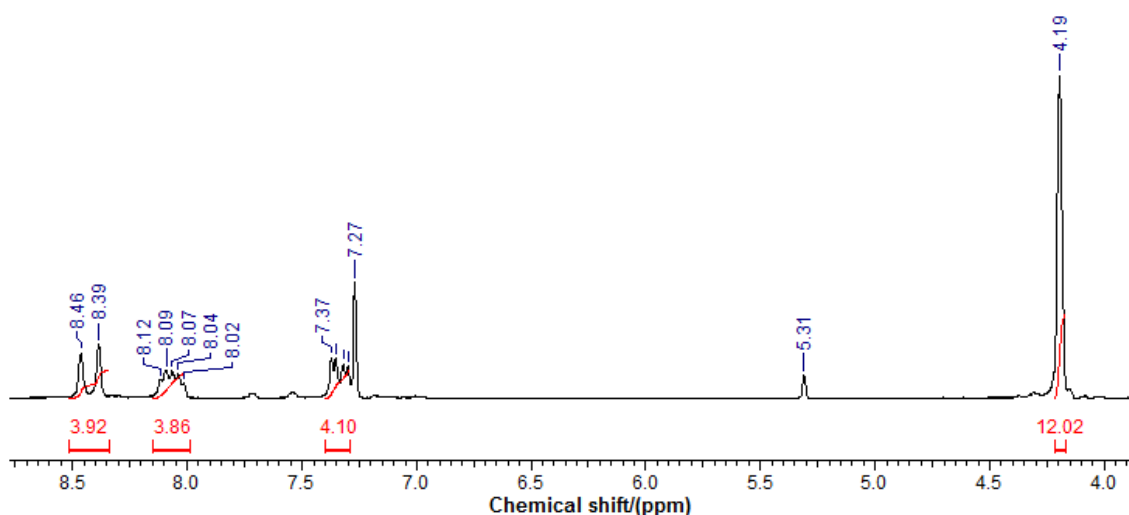

**Figure S4.**  $^1\text{H}$  NMR spectrum of  $\text{H}_2\text{Br}_{12}\text{T}_4(-\text{OMe})\text{PP}$  ( $\text{H}_2\text{Br}_{12}\text{Por}$ ) recorded at 400 MHz, in  $\text{CDCl}_3$  at 25 °C.  $\delta$  8.39 (d, 4H, *ortho*-aryl), 8.07 (m, 4H, *meta*-aryl), 7.35 (s, 4H, *ortho*-aryl), and 3.98 (s, 12H, methoxy).

The compounds studied here were characterized by infrared spectroscopy, Figure S5. The results confirmed the formation of the second- and third-generation metalloporphyrins.

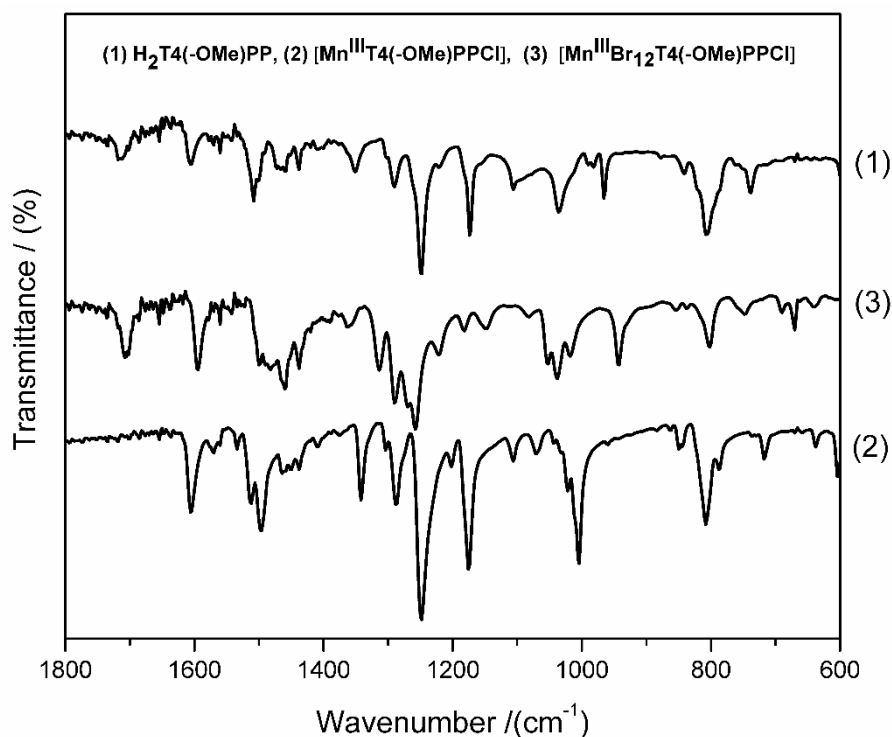

**Figure S5.** FTIR spectrum of  $\text{H}_2\text{T}_4(-\text{OMe})\text{PP}$  (1),  $[\text{Mn}^{\text{III}}\text{T}_4(-\text{OMe})\text{PPCl}]$  (2); and  $[\text{Mn}^{\text{III}}\text{Br}_{12}\text{T}_4(-\text{OMe})\text{PPCl}]$  (3) in KBr pellets.

[Mn<sup>III</sup>T4(-OMe)PPCI] FTIR in KBr (cm<sup>-1</sup>): (1604)  $\delta$  C=C; (1294)  $\delta$  porphyrin skeleton; (1249)  $\nu$  C-O-C; (1173)  $\nu$  OCH<sub>3</sub>; (1004)  $\delta$  Mn-N.

[Mn<sup>III</sup>Br<sub>12</sub>T4(-OMe)PPCI] FTIR in KBr (cm<sup>-1</sup>): (1594)  $\delta$  C=C; (1289)  $\delta$  porphyrin skeleton; (1272)  $\nu$  C <sub>$\beta$</sub> -Br; (1255)  $\nu$  C-O-C; (1175)  $\nu$  OCH<sub>3</sub>; (1004)  $\delta$  Mn-N.

The novel third-generation brominated manganese porphyrin (MnBr<sub>12</sub>Por) was characterized by mass spectrometry (Figure S6).

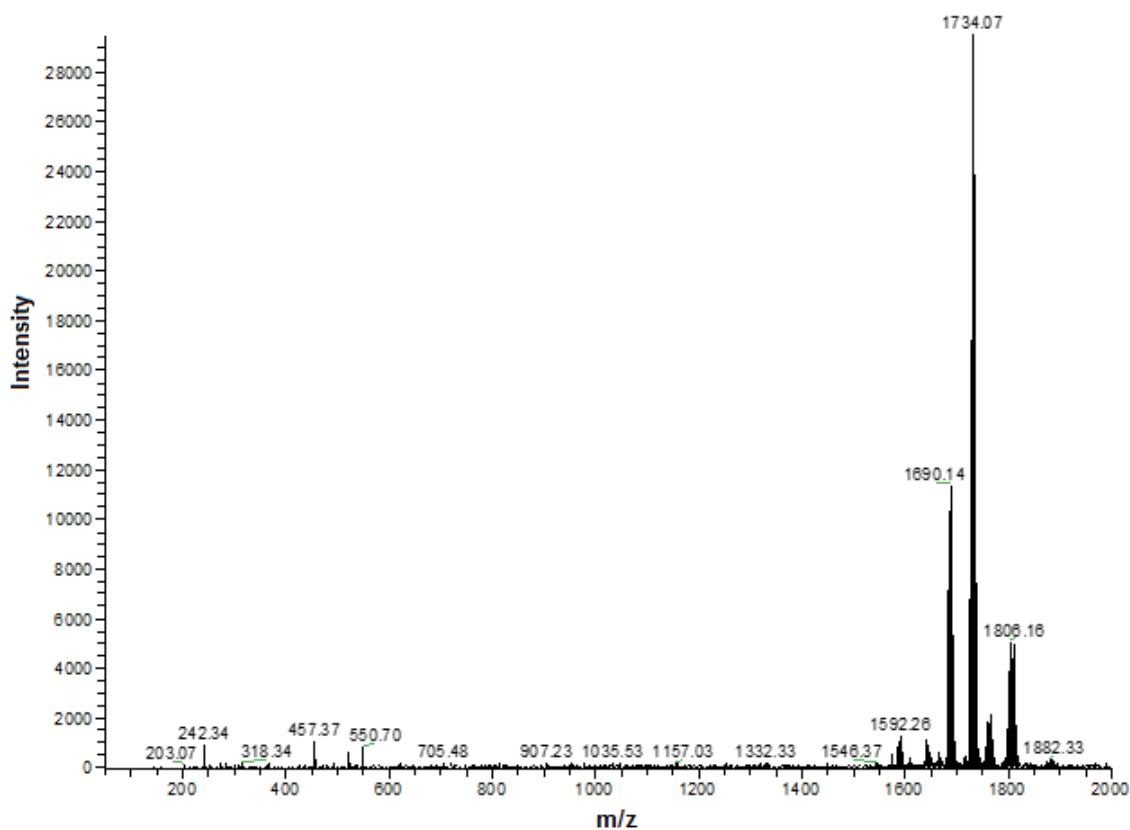

**Figure S6.** Mass spectrum of [Mn<sup>III</sup>Br<sub>12</sub>T4(-OMe)PPCI]. Analysis conducted in CH<sub>3</sub>OH with the ESI-MS operating in the positive mode.

The peak at  $m/z$  1734.07 is associated with the loss of chloride ion  $[\text{Mn}^{\text{III}}\text{Br}_{12}\text{T4}(-\text{OMe})\text{PP}]^+$ . The simulation of the spectrum using program ChemCalc (<http://www.chemcalc.org/>; Figure S7) is in agreement with the experimental spectrum. The peak at 1690.14 is associated with the loss of one bromine atom and protonation of macrocycle  $[\text{Mn}^{\text{III}}\text{Br}_{11}\text{T4}(-\text{OMe})\text{PPCl} + \text{H}^+]$  which  $m/z$  corresponds to 1690.19. The peak at 1806.16 can be associated with  $[\text{Mn}^{\text{III}}\text{Br}_{12}\text{T4}(-\text{OMe})\text{PPCl} + \text{HCl} + \text{H}^+]$ , which  $m/z$  is equal 1806.08.

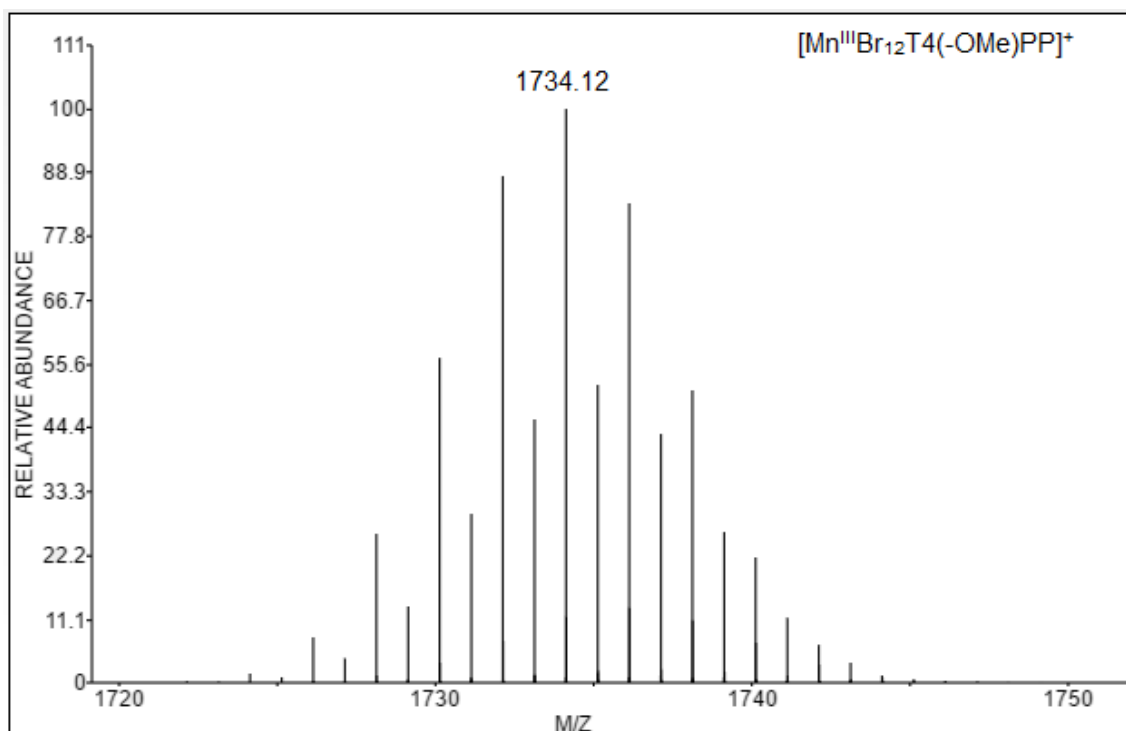

**Figure S7.** Simulated mass spectrum for the  $[\text{Mn}^{\text{III}}\text{Br}_{12}\text{T4}(-\text{OMe})\text{PP}]^+$  ion,  $\text{C}_{48}\text{H}_{24}\text{N}_4\text{O}_4\text{Br}_{12}\text{Mn}^+$ .

**Table S1.** Product yields obtained during the oxidation of *n*-hexane by PhIO or PhI(OAc)<sub>2</sub> catalyzed by MnP in CH<sub>2</sub>Cl<sub>2</sub> under aerobic condition. Yields based on the oxidant.

| Entry | Catalyst               | System                | Product Yield (%)   |                     |                      |                      | TON | Bleaching <sup>2</sup> (%) |
|-------|------------------------|-----------------------|---------------------|---------------------|----------------------|----------------------|-----|----------------------------|
|       |                        |                       | 2-ol <sup>1,3</sup> | 3-ol <sup>1,3</sup> | 2-one <sup>1,3</sup> | 3-one <sup>1,3</sup> |     |                            |
| 27    | MnPor                  | PhIO                  | 2.8                 | 3.7                 | 2.5                  | 3.4                  | 1.2 | 61                         |
| 28    | MnBr <sub>12</sub> Por | PhIO                  | 4.7                 | 5.4                 | 4.1                  | 4.3                  | 1.8 | 55                         |
| 29    | MnPor                  | PhI(OAc) <sub>2</sub> | 2.2                 | 2.8                 | 1.3                  | 2.5                  | 0.9 | 92                         |
| 30    | MnBr <sub>12</sub> Por | PhI(OAc) <sub>2</sub> | 2.9                 | 3.3                 | 2.5                  | 2.9                  | 1.1 | 68                         |
| 31    | MnPor                  |                       | 0                   | 0                   | 0                    | 0                    | -   | 0                          |
| 32    | MnBr <sub>12</sub> Por |                       | 0                   | 0                   | 0                    | 0                    | -   | 0                          |
| 33    |                        | PhIO                  | 0                   | 0                   | 0                    | 0                    | -   | -                          |
| 34    |                        | PhI(OAc) <sub>2</sub> | 0                   | 0                   | 0                    | 0                    | -   | -                          |
| 35    | Mn(OAc) <sub>2</sub>   | PhIO                  | 0                   | 0                   | 0                    | 0                    | -   | -                          |
| 36    | Mn(OAc) <sub>2</sub>   | PhI(OAc) <sub>2</sub> | 0                   | 0                   | 0                    | 0                    | -   | -                          |

Reaction conditions: [MnP or Mn(OAc)<sub>2</sub>] = 5 × 10<sup>-4</sup> mol L<sup>-1</sup>, [PhIO or PhI(OAc)<sub>2</sub>] = 5 × 10<sup>-3</sup> mol L<sup>-1</sup>, MnP/Oxidant/*n*-hexane/CH<sub>2</sub>Cl<sub>2</sub> molar ratio = 1:10:3630:15550, 25 °C, magnetic stirring, 90 min of reaction.<sup>1</sup>Yields based on the oxidant. 2-ol: 2-hexanol, 3-ol: 3-hexanol, 2-one: 2-hexanone and 3-one: 3-hexanone. <sup>2</sup>The degree of catalyst destruction was calculated from the UV-Vis absorption spectra recorded at the end of the reaction. <sup>3</sup>The maximum error is ± 0.5% with confidence level of 95%. <sup>4</sup>TON = total moles products per mol catalyst.

**Table S2.** Product yields obtained during the oxidation of cyclohexane by PhIO or PhI(OAc)<sub>2</sub> catalyzed by MnP in CH<sub>2</sub>Cl<sub>2</sub> under aerobic condition. Yields based on the oxidant.

| Entry | Catalyst                            | System                             | Product Yield (/%)   |                       | TON  | Select. <sup>7</sup> (/%) | Bleac. <sup>2</sup> (/%) |
|-------|-------------------------------------|------------------------------------|----------------------|-----------------------|------|---------------------------|--------------------------|
|       |                                     |                                    | Cy-ol <sup>1,3</sup> | Cy-one <sup>1,3</sup> |      |                           |                          |
| 37    |                                     | PhIO                               | 0                    | 0                     | -    | -                         | -                        |
| 38    |                                     | PhI(OAc) <sub>2</sub>              | 0                    | 0                     | -    | -                         | -                        |
| 39    | MnP <sub>or</sub>                   |                                    | 0                    | 0                     | -    | -                         | 0                        |
| 40    | MnBr <sub>12</sub> Por              |                                    | 0                    | 0                     | -    | -                         | 0                        |
| 41    | Mn(OAc) <sub>2</sub>                | PhIO                               | 0                    | 0                     | -    | -                         | -                        |
| 42    | Mn(OAc) <sub>2</sub>                | PhI(OAc) <sub>2</sub>              | 0                    | 0                     | -    | -                         | -                        |
| 43    |                                     | PhIO <sup>4</sup>                  | 1.3                  | 1.5                   | -    | 46                        | 0                        |
| 44    |                                     | PhI(OAc) <sub>2</sub> <sup>4</sup> | 0.6                  | 1.2                   | -    | 33                        | 0                        |
| 45    | MnBr <sub>12</sub> Por <sup>5</sup> | PhIO                               | 1.2                  | 2.0                   | 1.6  | 38                        | 100                      |
| 46    | MnBr <sub>12</sub> Por <sup>5</sup> | PhI(OAc) <sub>2</sub>              | 0.7                  | 1.4                   | 1.0  | 33                        | 100                      |
| 47    | MnBr <sub>12</sub> Por <sup>6</sup> | PhIO                               | 19.2                 | 6.2                   | 12.7 | 76                        | 100                      |
| 48    | MnBr <sub>12</sub> Por <sup>6</sup> | PhI(OAc) <sub>2</sub>              | 9.6                  | 4.2                   | 6.9  | 70                        | 100                      |

**Reaction conditions:** MnP or Mn(OAc)<sub>2</sub>/Oxidant/cyclohexane/CH<sub>2</sub>Cl<sub>2</sub> molar ratio = 1:10:4650:15550, 25 °C, magnetic stirring, 90 min of reaction. <sup>1</sup>Yields based on the oxidant. <sup>2</sup>The degree of catalyst destruction was calculated from the UV-Vis absorption spectra recorded at the end of the reaction. <sup>3</sup>The maximum error is ± 0.5% with confidence level of 95%. <sup>4</sup>Oxidant/cyclohexane/CH<sub>2</sub>Cl<sub>2</sub> molar ratio = 50:4650:15550. <sup>5</sup>MnP/Oxidant/cyclohexane/CH<sub>2</sub>Cl<sub>2</sub> molar ratio = 1:50:50:23325. <sup>6</sup>MnP/Oxidant/cyclohexane/CH<sub>2</sub>Cl<sub>2</sub> molar ratio = 1:50:4650:15550. <sup>7</sup>Selectivity for the alcohol was determined from the relation: Selectivity = 100 × [%Cy-ol / (%Cy-ol + %Cy-one)]. <sup>8</sup>TON = total moles products per mol catalyst.

**Table S3.** Product yields obtained during the oxidation of adamantane by PhIO or PhI(OAc)<sub>2</sub> catalyzed by MnP in CH<sub>2</sub>Cl<sub>2</sub> under aerobic condition. Yields based on the oxidant.

| Entry | Catalyst               | System                | Product Yield (/%)  |                     | Bleac. <sup>2</sup> (/%) |
|-------|------------------------|-----------------------|---------------------|---------------------|--------------------------|
|       |                        |                       | 1-Adol <sup>1</sup> | 2-Adol <sup>1</sup> |                          |
| 49    | Mn(OAc) <sub>2</sub>   | PhIO                  | 0                   | 0                   | -                        |
| 50    | Mn(OAc) <sub>2</sub>   | PhI(OAc) <sub>2</sub> | 0                   | 0                   | -                        |
| 51    | MnP <sub>or</sub>      | -                     | 0                   | 0                   | 0                        |
| 52    | MnBr <sub>12</sub> Por | -                     | 0                   | 0                   | 0                        |

**Reaction conditions:** [MnP or Mn(OAc)<sub>2</sub>] = 5 × 10<sup>-4</sup> mol L<sup>-1</sup>, [PhIO or PhI(OAc)<sub>2</sub>] = 5 × 10<sup>-3</sup> mol L<sup>-1</sup>, MnP/Oxidant/adamantane/CH<sub>2</sub>Cl<sub>2</sub> molar ratio = 1:10:100:23325, 25 °C, magnetic stirring, 90 min. of reaction. <sup>1</sup>Yields based on the oxidant. 1-adol: 1-adamantanol, 2-adol: 2-adamantanol. <sup>2</sup>The degree of catalyst destruction was calculated from the UV-Vis absorption spectra recorded at the end of the reaction. <sup>3</sup>TON = total moles products per mol catalyst.



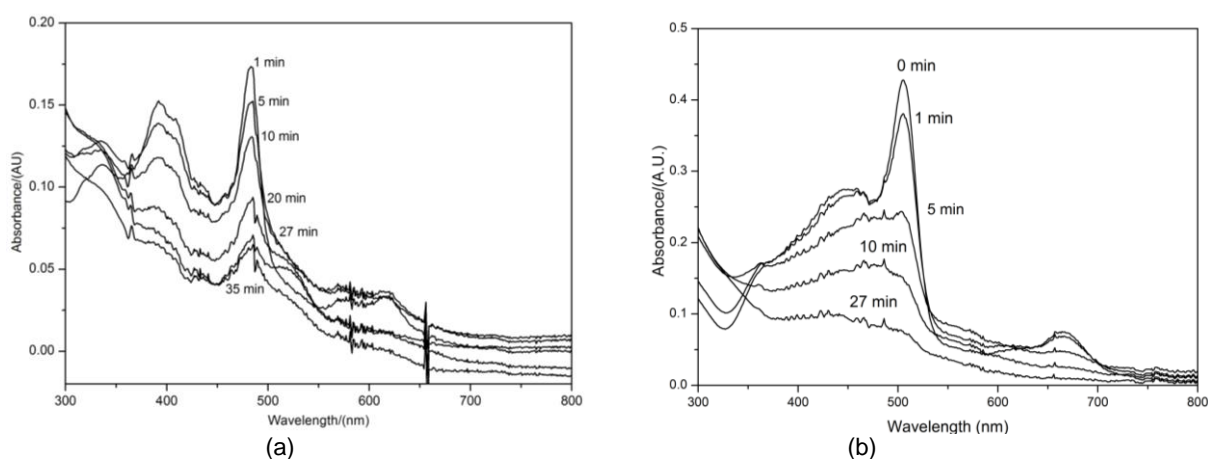

**Figure S8.** UV-vis transient spectra of (a) MnPor and (b) MnBr<sub>12</sub>Por in presence of PhIO in CH<sub>2</sub>Cl<sub>2</sub>. Condition of reaction: molar ratio: MnP:PhIO 1:10.

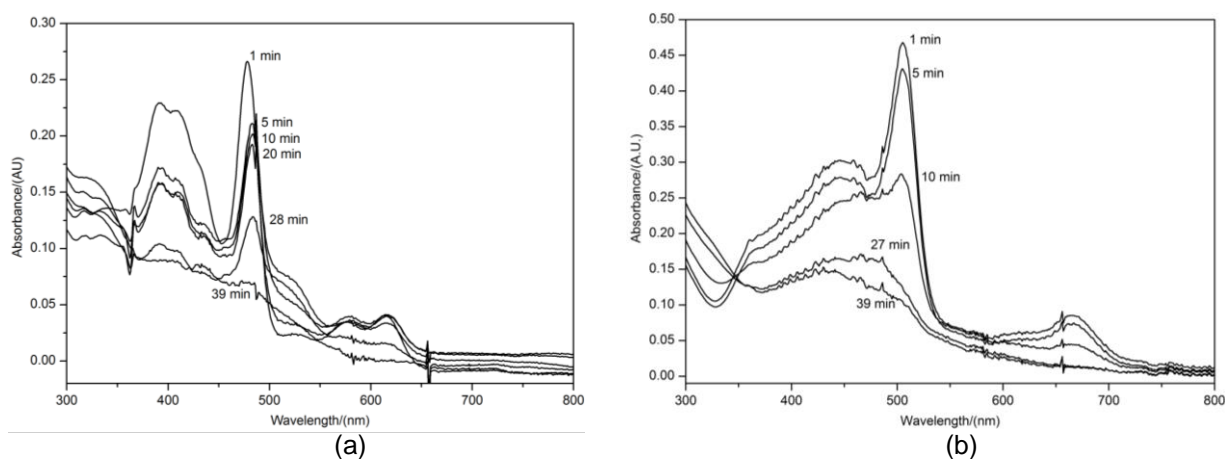

**Figure S9.** UV-vis transient spectra of (a) MnPor and (b) MnBr<sub>12</sub>Por in presence of PhI(OAc)<sub>2</sub> in CH<sub>2</sub>Cl<sub>2</sub>. Condition of reaction: molar ratio: MnP:PhI(OAc)<sub>2</sub> 1:10.

## References

- [1] J.S. Rebouças, M.E.M.D. de Carvalho, Y.M. Idemori, J. Porphyrins Phthalocyanines, 06 (2002) 50-57.
- [2] Y. Fang, P. Bhyrappa, Z. Ou, K.M. Kadish, Chem.-A Eur. J., 20 (2014) 524-532.
- [3] V.S. da Silva, L.I. Teixeira, E. do Nascimento, Y.M. Idemori, G. DeFreitas-Silva, Appl. Catal.A: Gen., 469 (2014) 124-131.
